# Supplementary material for: One-step growth of 3D CoNi2S4 nanorods and cross-linked NiCo2S4 nanosheet arrays on carbon paper as anodes for high-performance lithium ion batteries
Source: Royal Society of Chemistry journal article supplement (doi:10.1039/c5cc10368a), 2016-01-01
Supplement: c5cc10368a1.pdf [file c5cc10368a1.pdf]

## Supplementary Information

# One-Step growth of 3D cross-linked NiCo<sub>2</sub>S<sub>4</sub> nanosheet and CoNi<sub>2</sub>S<sub>4</sub> nanorod arrays on carbon paper as anodes for high-performance lithium ion battery

Weiwei Yang,<sup>a</sup> Liang Chen,<sup>b</sup> Jie Yang,<sup>b</sup> Chun Fang,<sup>a</sup> Xiang Zhang,<sup>a</sup> Zhiling Chen,<sup>a</sup> Lin Huang,<sup>a</sup> Jianguo Liu,<sup>a,b,c\*</sup> Yong Zhou,<sup>b</sup> and Zhigang Zou<sup>a,b\*\*</sup>

<sup>a</sup> National Laboratory of Solid State Microstructures, College of Engineering and Applied Sciences, and Collaborative Innovation Center of Advanced Microstructures, Nanjing University, 22 Hankou Road, Nanjing 210093, China.

<sup>b</sup> Jiangsu Key Laboratory for Nano Technology, Department of Physics, Nanjing University, 22 Hankou Road, Nanjing 210093, China.

<sup>c</sup> Kunshan Sunlaite New Energy Co., Ltd., Kunshan, 1699# South Zuchongzhi Road, Suzhou, 215347, China.

## Experimental Section

### Preparation of CoNi<sub>2</sub>S<sub>4</sub> and NiCo<sub>2</sub>S<sub>4</sub>.

Before using it, commercial carbon paper (CP) was ultrasonically cleaned in ethanol and deionized water for 30 min respectively. In a typical synthesis, 2.5 mmol Co(CH<sub>3</sub>COO)<sub>2</sub>·4H<sub>2</sub>O, 1.25 mmol Ni(CH<sub>3</sub>COO)<sub>2</sub>·4H<sub>2</sub>O and 6 mmol thiourea (CN<sub>2</sub>H<sub>4</sub>S) were mixed for 30 min to form a puce solution with 30 ml deionized water and 10 ml ammonia hydroxide (~28%) as solvent at 25 °C. After, the mixture of puce solution and cleaned carbon paper (CP) were transferred into a Teflon-lined stainless steel autoclave of 100 mL inner volume, which was subsequently heated at 160 °C for 10 h. After the hydrothermal reaction, the CP was taken out from above mixed solution at room temperature and further cleaned by ultrasonication for 5 min to remove the attached products on the surface. After washed with deionized water and ethanol for several times, the 3D cross-linked NiCo<sub>2</sub>S<sub>4</sub> nanosheet arrays (NiCo<sub>2</sub>S<sub>4</sub> NSAs-CP) were obtained. In order to improve the crystallinity, the NiCo<sub>2</sub>S<sub>4</sub> NSAs-CP were annealed under N<sub>2</sub> atmosphere at 350 °C for 2 h. Meanwhile, 3D CoNi<sub>2</sub>S<sub>4</sub> nanobelt arrays (CoNi<sub>2</sub>S<sub>4</sub> NRAs-CP) also can be obtained with 1.25 mmol Co(CH<sub>3</sub>COO)<sub>2</sub>·4H<sub>2</sub>O and 2.5 mmol Ni(CH<sub>3</sub>COO)<sub>2</sub>·4H<sub>2</sub>O while other condition not changed.

## Characterizations

X-ray powder diffraction patterns were performed on a Philips X-ray diffractometer (APD 3520) equipped with Cu K $\alpha$  radiation. The morphologies observations (SEM) and composition analysis (energy-dispersive X-ray spectroscopy, EDX) of the samples were carried out on S-4800 scanning electron microscopy (SEM) operating at 5 kV. The transmission electron microscopy (TEM) and high-resolution transmission electron microscopy (HR-TEM) images were collected by JEM 200CX TEM instrument.

## Electrochemical measurement

The 3D CoNi<sub>2</sub>S<sub>4</sub> NRAs-CP and cross-linked NiCo<sub>2</sub>S<sub>4</sub> NSAs-CP were directly used as working electrodes without adding any other assist materials. The loading weight of the CoNi<sub>2</sub>S<sub>4</sub> NRAs-CP and NiCo<sub>2</sub>S<sub>4</sub> NSAs-CP (the active material) were about  $2 \pm 0.3$  mg ( $1.300 \pm 0.195$  mg·cm<sup>-2</sup>) and CP was 12.23 mg ( $7.949$  mg·cm<sup>-2</sup>). In addition, pure CP was also used as cathode to compare with CoNi<sub>2</sub>S<sub>4</sub> NRAs-CP and NiCo<sub>2</sub>S<sub>4</sub> NSAs-CP and reference. The electrochemical performance were evaluated with a standard CR2032 coin cell using lithium foils as the anode, microporous polypropylene separator (Celgard 2400) as the separator, and electrolyte solution was made of 1 M LiPF<sub>6</sub> in ethylene carbonate (EC) and diethyl carbonate (DEC) (1/1, in volume). The coin-type cells were assembled in an argon-filled glove box, where both moisture and oxygen levels were less than 1 ppm. Galvanostatic charge-discharge cycles were tested by LAND CT 2001A multi-channel. Cyclic voltammeter (CV) was conducted by using Princeton Applied Research PARSTAT 2273 at scanning rate of 0.1 mV·s<sup>-1</sup> between 0.01–3.0 V.

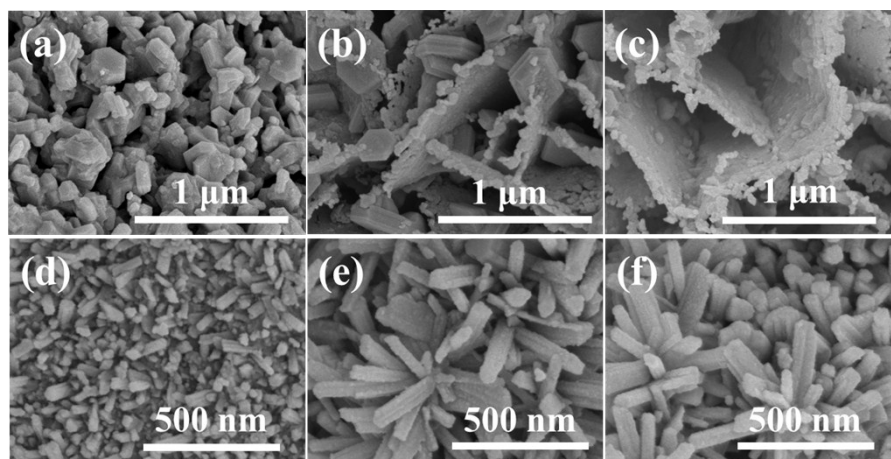

**Fig. S1** Typical SEM images of NiCo<sub>2</sub>S<sub>4</sub> NSAs-CP synthesized for 2.5 h (a), 5 h(b) ,7.5 h (c) and

CoNi<sub>2</sub>S<sub>4</sub> NRAs-CP synthesized for 2.5 h (d), 5 h (e) ,7.5 h (f)

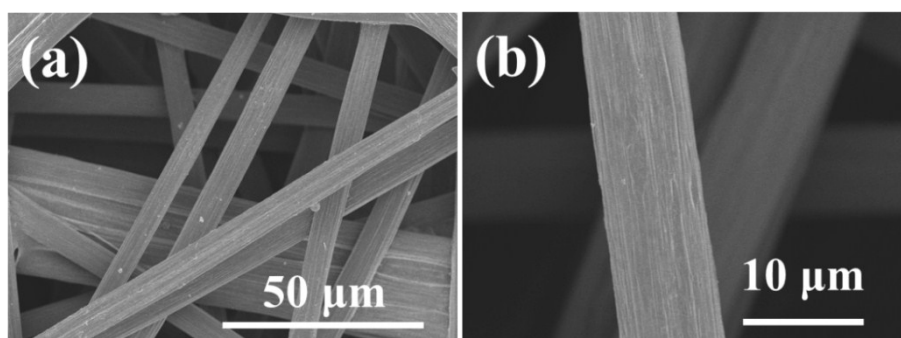

**Fig. S2** Typical low (a) and magnified (b) SEM images of pure CP.

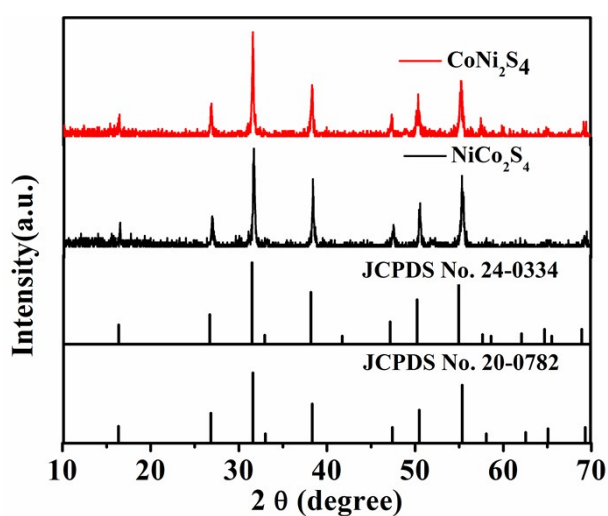

**Fig. S3** XRD spectrum of NiCo<sub>2</sub>S<sub>4</sub> and NiCo<sub>2</sub>S<sub>4</sub> ultrasonic treatment from CP.

The phase structure of CoNi<sub>2</sub>S<sub>4</sub> and NiCo<sub>2</sub>S<sub>4</sub> was characterized by X-ray diffraction (XRD) as shown in Fig. S3. The crystalline phase of the as-prepared samples can be identified as CoNi<sub>2</sub>S<sub>4</sub> (JCPDS No. 24-0334) and NiCo<sub>2</sub>S<sub>4</sub> (JCPDS No. 20-0782) with very similar cubic structures. Besides, no other characteristic peaks can be observed, suggesting that both samples have no other impure phases.

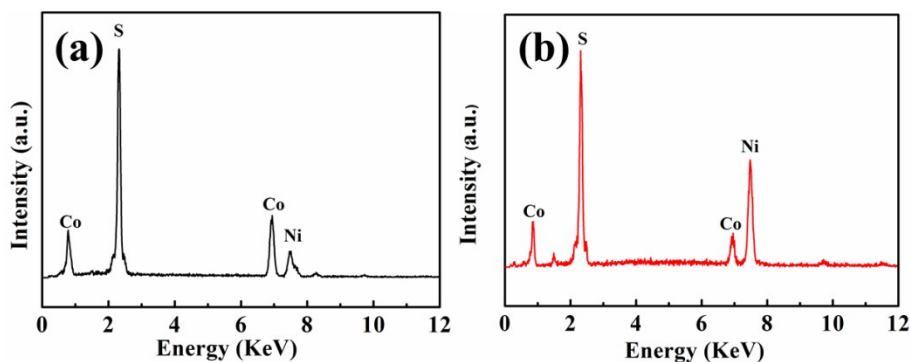

**Fig. S4** EDX of NiCo<sub>2</sub>S<sub>4</sub>-CP (a) and NiCo<sub>2</sub>S<sub>4</sub>-CP (b).

The samples were further characterized by energy-dispersive X-ray spectroscopy (EDX, Fig. S4), which indicates that the Ni/Co atomic ratios of  $\text{CoNi}_2\text{S}_4$  and  $\text{NiCo}_2\text{S}_4$  are 1.85 : 1 and 1: 2.08, respectively. The reason for the relatively small amount for the Ni atomic ratios could be ascribed to bits of  $\text{Ni}^{2+}$  ions being reduced to metallic nickel.

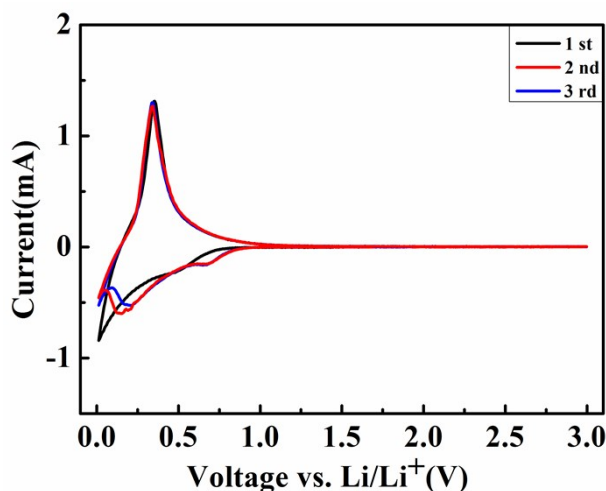

**Fig. S5** CV curves of pure CP at the scan rate of  $0.1 \text{ mV s}^{-1}$  between 0.01 and 3 V.

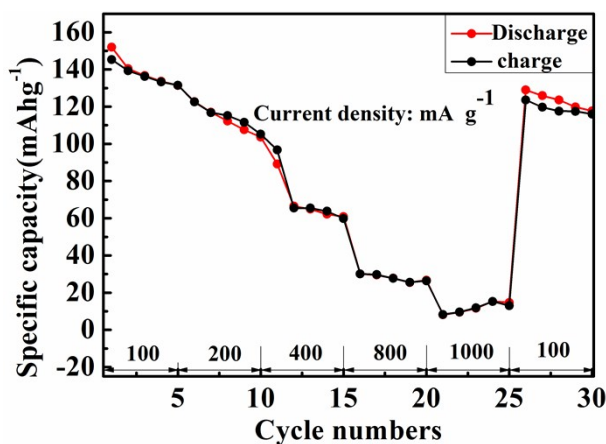

**Fig. S6** Rate performance of pure CP electrode at 100, 200, 400, 800 and  $1000 \text{ mA g}^{-1}$ .

The current collector of CP will insert an amount of Li during the discharge process and finally increase the specific discharge capacity. The specific discharge capacity of the pure CP electrode at 100, 200, 400, 800 and  $1000 \text{ mA g}^{-1}$  are shown in Fig. S6.

**Table S7** Rate performance of synthesized  $\text{NiCo}_2\text{S}_4$  NRAs-CP and  $\text{CoNi}_2\text{S}_4$  NRAs-CP compared with previous published studies on binary or ternary Co/Ni based sulfides.

| Species (mA h g <sup>-1</sup> )                   | Current density (mA g <sup>-1</sup> ) |         |         |        |       | Reference |
|---------------------------------------------------|---------------------------------------|---------|---------|--------|-------|-----------|
|                                                   | 100                                   | 200/250 | 400/500 | 800    | 1000  |           |
| NiCo <sub>2</sub> S <sub>4</sub> NSA/carbon cloth | 1950                                  | /       | 1220    | /      | 1030  | [1]       |
| NiCo <sub>2</sub> S <sub>4</sub> nanorod          | ~1200                                 | ~1100   | ~900    | /      | ~800  | [2]       |
| NiS                                               | ~650                                  | ~550    | ~500    | /      | ~500  | [3]       |
| Ni <sub>3</sub> S <sub>2</sub> nanotube array     | 495                                   | 466     | 453     | /      | 418   | [4]       |
| CoS <sub>2</sub> /G                               | ~650                                  | ~550    | ~450    | ~400   | /     | [5]       |
| Co <sub>9</sub> S <sub>8</sub>                    | 904                                   | 810     | 751     | /      | 699   | [6]       |
| Our NiCo <sub>2</sub> S <sub>4</sub> NSAs-CP      | 2363.3                                | 2107.8  | 1712.4  | 1242.1 | 707.7 | /         |
| Our CoNi <sub>2</sub> S <sub>4</sub> NRAs-CP      | 1979.3                                | 1728.8  | 1418.6  | 897.8  | 465.2 | /         |

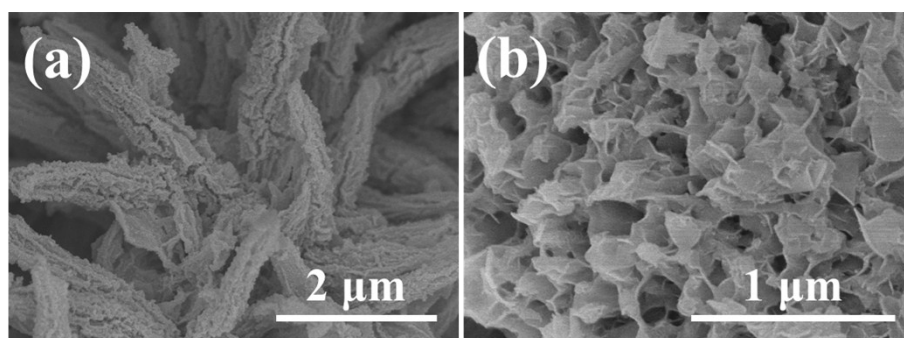

**Fig. S8** Typical SEM images of NiCo<sub>2</sub>S<sub>4</sub> NSAs-CP (a) and CoNi<sub>2</sub>S<sub>4</sub> NRAs-CP (b).

**Table S9** The specific discharge capacity of NiCo<sub>2</sub>S<sub>4</sub> NRAs-CP, CoNi<sub>2</sub>S<sub>4</sub> NRAs-CP, CP, NiCo<sub>2</sub>S<sub>4</sub> NRAs and CoNi<sub>2</sub>S<sub>4</sub> NRAs.

| Species (mA h g <sup>-1</sup> )                 | Current density (mA g <sup>-1</sup> ) |        |        |        |       |
|-------------------------------------------------|---------------------------------------|--------|--------|--------|-------|
|                                                 | 100                                   | 200    | 400    | 800    | 1000  |
| Total NiCo <sub>2</sub> S <sub>4</sub> NSAs-CP  | 2363.3                                | 2107.8 | 1712.4 | 1242.1 | 707.7 |
| Total CoNi <sub>2</sub> S <sub>4</sub> NRAs-CP  | 1979.3                                | 1728.8 | 1418.6 | 897.8  | 465.2 |
| CP                                              | 152.0.                                | 122.7  | 89.2   | 30.1   | 8.1   |
| Actual NiCo <sub>2</sub> S <sub>4</sub> NSAs-CP | 1433.8                                | 1357.5 | 1166.9 | 1058.0 | 695.4 |
| Actual CoNi <sub>2</sub> S <sub>4</sub> NRAs-CP | 1049.8                                | 978.5  | 873.1  | 713.7  | 415.7 |

## Notes and references

1. R. J. Zou, Z. Y. Zhang, M. F. Yuen, M. L. Sun, J. Q. Hu, C.-S Lee and W. J. Zhang, *NPG Asia Mater.*, 2015, **7**, 1.
2. Y. Luo, M.-S. Balogun, W. T. Qiu, R. R. Zhao, P. Liu and Y. X. Tong, *Chem. Commun.*, 2015, **51**, 13016.
3. H. Geng, S. F. Kong and Y. Wang, *J. Mater. Chem. A.*, 2014, **2**, 15152.
4. D. Li, X. W. Li, X. Y. Hou, X. L. Sun, B. L. Liu and D. Y He, *Chem. Commun.*, 2014, **50**, 9361.
5. J. Xie, S. Y. Liu, G. S. Cao, T. J. Zhu and X. B. Zhao, *Nano Energy* 2013, **2**, 49.
6. Y. L. Zhou, D. Yan, H. Y. Xu, S. Liu, J. Yang and Y. T. Qian, *Nanoscale*, 2015, **7**, 3520.
